# Supplementary material for: Identification of Auxiliary Biomarkers and Description of the Immune Microenvironmental Characteristics in Duchenne Muscular Dystrophy by Bioinformatical Analysis and Experiment
Source: Frontiers journal article supplement (doi:10.3389/fnins.2022.891670), 2022-06-03
Supplement: Data_Sheet_1.pdf [file Data_Sheet_1.pdf]

## Supplement Figure 1

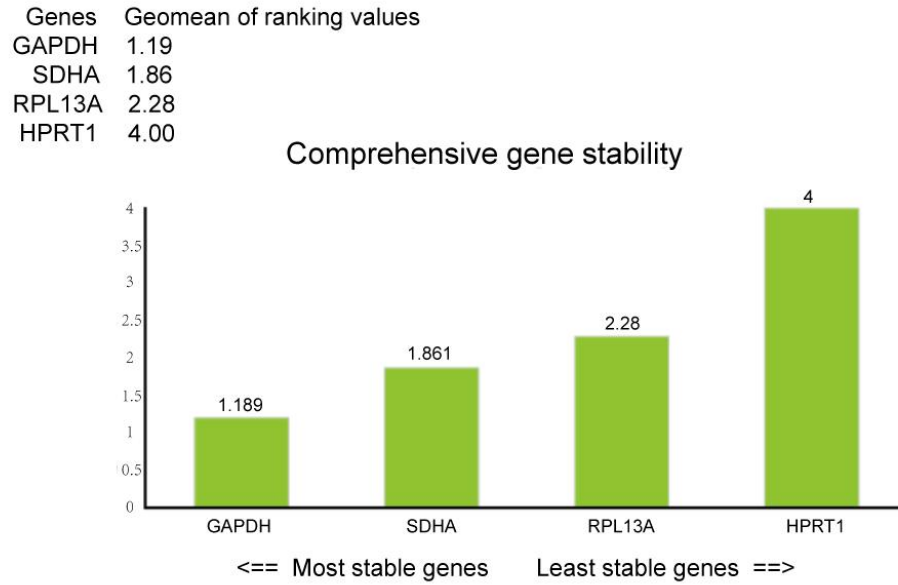

Figure S1. Gene expression stability ranked by RefFinder
